# 1 An *In-Silico* Investigation of Menthol Metabolism

2 Taweetham Limpanuparb, Wanutcha Lorpaiboon and Kritdin Chinsukserm

3 Science Division, Mahidol University International College, Mahidol University, Nakhon Pathom 73170, Thailand

## 4 ABSTRACT

5 Prevalence of mentholated products for consumption has brought great importance to studies on menthol's metabolic  
6 pathways to ensure safety, design more potent derivatives, and identify therapeutic benefits. Proposed pathways of (-)-  
7 menthol metabolism based on metabolites found experimentally in previous works by Yamaguchi, Caldwell & Farmer,  
8 Madyastha & Srivatsan and Hiki et al. were not in agreement. This *in silico* approach is based on the three *in vivo* studies and  
9 aims to resolve the discrepancies. Reactions in the pathways are conjugation with a glucuronic acid/sulfate group, oxidation to  
10 alcohol, aldehyde & carboxylic acid, and formation of a four-membered/five-membered ring. Gas-phase structures, standard  
11 Gibbs energies and SMD solvation energies at B3LYP/6-311++G(d,p) level were obtained for 102 compounds in the pathways.  
12 This study provides a more complete picture of menthol metabolism by combining information from three experimental studies  
13 and filling missing links in previously published pathways.

## 14 Introduction

15 (-)-Menthol or 1*S*,3*R*,4*S*-menthol is a naturally occurring compound found in plants of the *Mentha* genus commonly known as  
16 mint. It is the most abundant in nature among the 8 possible stereoisomers, comprising of at least 50% of peppermint  
17 (*Mentha piperita*) oil and 70-80% of corn mint (*Mentha arvensis*) oil (1). (-)-Menthol, commonly referred to as menthol, has  
18 characteristic minty smell and flavor and exerts a cooling sensation when applied to the skin and mucosal membranes (2). Other  
19 isomers differ slightly in odor and physical characteristics and do not possess the cooling action (3, 4).

20 Menthol finds a wide range of applications from personal care products, medications, and confectionery to pesticides and  
21 cigarettes. The popularity of the compound as a flavoring agent ranks third most important after vanilla and citrus (5), and the  
22 annual production of menthol in India alone is in excess of 200 thousand metric tons (6). Due to its popularity, mentholated  
23 products can be readily purchased as prescribed or over-the-counter medications as alleviators of common cold and respiratory  
24 conditions (7), inhibitors of growth of foodborne pathogens (8), and analgesics (9).

25 Considering its wide range of applications, mechanisms of action of menthol were relatively unknown until recently. The cooling  
26 sensation is a result of the activation of transient receptor potential melastatin-8 (TRPM8), an ion channel selective to  
27 temperature, voltage, and menthol (10). Experimental evidence also show that (-)-menthol can selectively activate  $\kappa$ -opioid  
28 receptors in mice and, as a result, lead to analgesic properties (9).

29 Chemical derivatives of menthol with enhanced activity have been successfully synthesized (11). In addition, health effects of  
30 mentholated cigarettes is of great concern, not only because the improved taste may facilitate initiation or inhibit quitting but  
31 also because metabolism of menthol via this route of administration has not been well studied (12, 13).

32 A few studies have been conducted on toxicological effects of menthol which supports the generally accepted belief that it is  
33 safe and nontoxic. No signs of toxicity were observed in rats exposed to continuous doses of up to 800 mg/kg/day for 28 days  
34 (5), and chronic exposure to high concentrations of menthol vapor was not reported to have toxic effects in rats (14). *In vitro*  
35 studies on various animal tissues report deterioration of biological membranes at concentrations 0.32-0.76 mM (15). The  
36 recommended daily intake for humans of 0-0.2 mg/kg proposed by the WHO (16) is not supported by any toxicological data but  
37 was set to err on the side of safety knowing that higher doses taken may not have produced adverse side effects.

38 To the best of our knowledge, three *in vivo* studies by Yamaguchi, Caldwell & Farmer (17), Madyastha & Srivatsan (18) and Hiki  
39 et al. (19) have identified metabolites of menthol in humans and animals. Metabolites were identified by GC/MS from the  
40 urinary and biliary metabolites in rats treated with oral doses of 500 (17) and 800 (18) mg menthol/kg body weight. Over the  
41 course of 48 hours, a majority of the doses were excreted in the urine and feces. A more recent randomized, double-blind,  
42 placebo-controlled study in human by Hiki et al. (19) was conducted by directly spraying 0.8% (-)-menthol solution at escalating  
43 doses of 10-40 mL onto the gastric mucosa. Blood and urine of the participants were sampled over a 24-hour period and  
44 analyzed with GC/MS for menthol metabolites. In total, 72 metabolites were identified or proposed in this human study,  
45 compared to 9 and 18 metabolites in the previous two experiments. (See supplementary information for the full list.) *In vitro*  
46 investigation of metabolism in human liver microsomes revealed that the same key reactions in the metabolic pathway in rats  
47 occur in the microsomes (20, 21).

48

49 **FIGURE 1** Metabolic pathway of menthol in rats and in human, an adaptation from Yamaguchi, Caldwell, & Farmer (17), Madyastha & Sirvastan (18) and Hiki et  
50 al. (19). Red, Green, and Blue texts indicate that menthol metabolites were found in both rats and human, only in rats, and only in human respectively. Gray and  
51 Black texts indicate menthol metabolites proposed by previous experiments and by this paper respectively. Arrows to the right and arrows upward indicate  
52 oxidation reactions  $+\frac{1}{2}O_2$  and  $-H_2$  respectively. Downward arrows indicate conjugation with a sulfate group. Dashed arrows indicate reactions of four-membered  
53 ring metabolites. Diagonal arrows toward top left indicate dehydration reaction. Main pathways are shown on the left and pathways containing metabolites  
54 from conjugations with a glucuronic acid with similar possible connections are shown separately on the right. The full list of compounds is provided in Table 1

55

56 This *in silico* investigation is based on the metabolites identified experimentally by the three *in vivo* studies (17-19). We aim to  
57 resolve discrepancies and missing links found in these three studies by proposing more complete pathways in Figure 1 where  
58 all 73 experimentally identified metabolites, 5 previously proposed intermediates and 24 newly proposed intermediates are  
59 included. Possible reactions involving in the pathways are conjugation with a glucuronic acid/sulfate group, oxidation to alcohol,  
60 aldehyde & carboxylic acid, and formation of a four/five-membered ring at position 3, 7, 8, 9 and 10 of the parent compound.  
61 In this paper, we calculated Gibbs energies of reactions and associated them with the type, the position and the step of reaction  
62 in the pathways.

## 63 Materials and methods

64 Gas-phase structures were calculated based on the B3LYP/6-311++G(d,p) level and were confirmed to be at minimum energy  
65 on the electronic potential energy surfaces by frequency calculations. The solvation energies in water of the gas-phase  
66 structures were calculated with the SMD model (22). The calculation of Gibbs energies in solution phase is the same as in our  
67 previous work (23, 24) where there is a special treatment for water (25-28). All quantum chemical calculations were performed  
68 using the Q-Chem 5.1 program package (29). (Shell script, spreadsheet templates, and Mathematica (30) notebook used were  
69 modified from our previous work (23, 24). All output files and other associated codes to obtain the standard Gibbs energies of  
70 the reaction are provided in the electronic supporting information). The abbreviated names for each of the metabolites in this  
71 study are as in Figure 1. For simplicity, we based the naming system of menthol metabolites on their five substitutable positions,  
72 namely position 3, 7, 8, 9 and 10. A menthol metabolite is referred to as a five-character sequence named according to its  
73 substituted functional groups at these positions with the abbreviation explained below in Table 1.  
74 All DFT calculations were completed with no imaginary frequencies, showing that each of the structures obtained from gas-  
75 phase calculations were minima on the potential energy surfaces. The lowest energy structure of (-)-menthol is a chair  
76 conformer of hexane where all three substituent groups are in equatorial positions as shown in Table 1. This is consistent with  
77 previous computational result at B3LYP/6-31G(d,p) level (31). Benchmark calculations were also performed at MP2/6-  
78 311++G(d,p) level for metabolites along the most likely pathways in Figure 2. Reaction energies obtained from MP2 and B3LYP  
79 are in good agreement. (Coefficient of determination  $r^2=0.9999$  and mean absolute error, MAE=2.25 kcal/mol. See  
80 Supplementary Information for details.)

81

## 82 Results

83 The present study has combined the different published metabolic pathways of menthol and offers the relative stabilities of  
84 each metabolite based on thermodynamic calculations for each step involved as reported in Figures 1 to 4. Reaction energies  
85 were computed as listed in Supplementary Information with the relevant additional reagents (oxygen, sulfate group, hydronium  
86 ion and glucuronic acid) and product (water and hydrogen) added to the scheme. They may not be the actual compound in the  
87 reactions but they serve as simple reference points for the thermodynamic calculations for reactions of interested.

88

89

90  
91  
92

**TABLE 1** Abbreviations for the nomenclature of menthol metabolites referred to by the present study and a list of 102 compounds in this study grouped by molecular formula.

| Position \ Group | 3                                                         | 7          | 8 | 9            | 10 |
|------------------|-----------------------------------------------------------|------------|---|--------------|----|
| Original form    | o                                                         | e          | e | e            | e  |
| Alkane           | -                                                         | e          | e | e            | e  |
| Alcohol          | o                                                         | o          | o | <u>o</u>     | o  |
| Aldehyde         | y                                                         | <u>y</u>   | - | <u>y</u>     | y  |
| Carboxylic acid  | -                                                         | <u>x</u>   | - | <u>x</u>     | -  |
| Dehydration      | -4D for four-membered ring formation at positions 3 and 8 |            |   |              |    |
| Aldol reaction   | -5A for four-membered ring formation at positions 3 and 9 |            |   |              |    |
| Glucuronic acid  | O                                                         | <u>O,X</u> | - | <u>O,X,Y</u> | -  |
| Sulfate group    | s                                                         | -          | - | -            | -  |

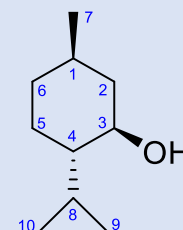

- An underlined indicates that there are *R* and *S* stereoisomers due to the substitution.
- Substitution at position 9 leads to a new chiral center if it is not the same as 10.
- Substitution at position 10 is forced to have lower or the same oxidation state for the carbon atom when compared to position 9.
- Dashes are where substitution with the functional group at that respective position cannot occur

93  
94

formula: C<sub>10</sub>H<sub>20</sub>O (molar mass 156.26, total 1 compound)

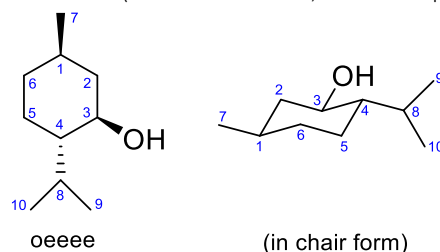

formula: C<sub>10</sub>H<sub>20</sub>O<sub>2</sub> (molar mass 172.26, total 4 compounds)

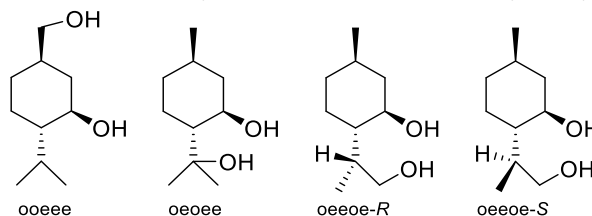

formula: C<sub>10</sub>H<sub>20</sub>O<sub>3</sub> (molar mass 188.26, total 6 compounds)

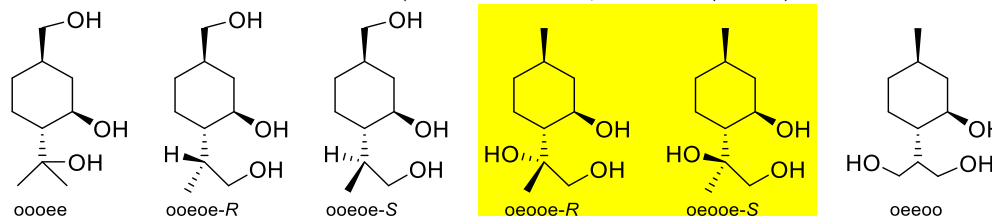

formula: C<sub>10</sub>H<sub>18</sub>O<sub>2</sub> (molar mass 170.25, total 4 compounds)

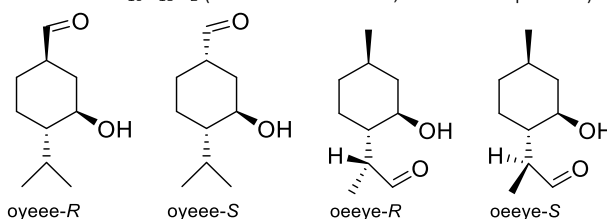

formula:  $C_{10}H_{18}O_3$  (molar mass 186.25, total 28 compounds)

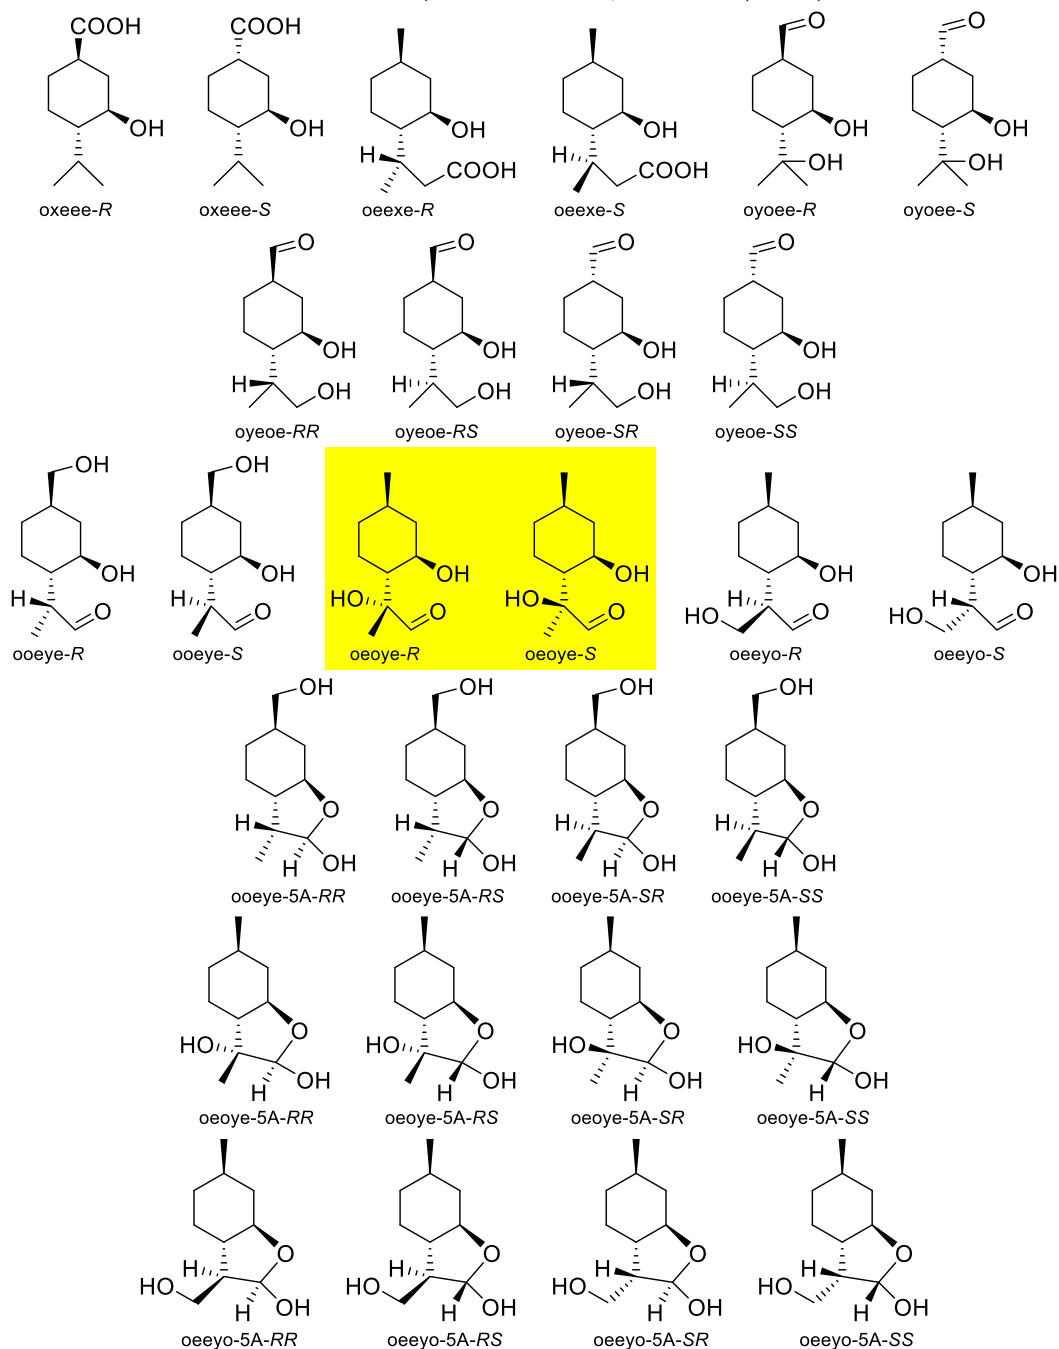

formula:  $C_{10}H_{18}O_4$  (molar mass 202.25, total 2 compounds)

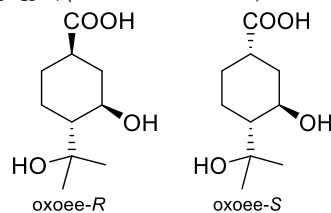

formula:  $C_{10}H_{16}O_3$  (molar mass 184.23, total 5 compounds)

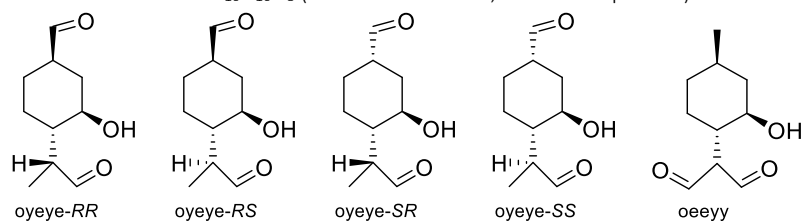

formula: C<sub>10</sub>H<sub>18</sub>O (molar mass 154.25, total 1 compound)

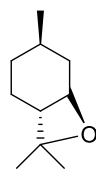

oeeee-4D

formula: C<sub>10</sub>H<sub>18</sub>O<sub>2</sub> (molar mass 170.25, total 1 compound)

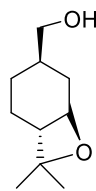

oooo-4D

formula: C<sub>10</sub>H<sub>16</sub>O<sub>2</sub> (molar mass 168.23, total 2 compounds)

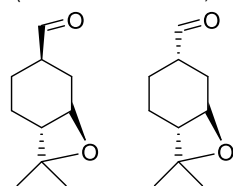

oyeee-4D-R    oyeee-4D-S

formula: C<sub>10</sub>H<sub>16</sub>O<sub>3</sub> (molar mass 184.23, total 2 compounds)

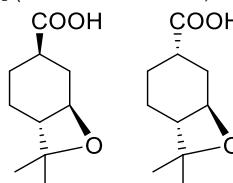

oxoeee-4D-R    oxoeee-4D-S

formula: C<sub>10</sub>H<sub>20</sub>O<sub>4</sub>S (molar mass 236.33, total 1 compound)

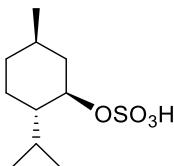

seeee

formula: C<sub>10</sub>H<sub>20</sub>O<sub>5</sub>S (molar mass 252.33, total 3 compounds)

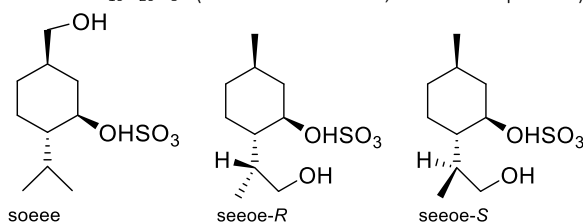

soeee

seoee-R

seoee-S

formula: C<sub>10</sub>H<sub>20</sub>O<sub>6</sub>S (molar mass 268.33, total 2 compounds)

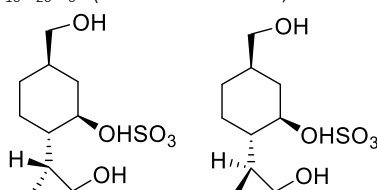

soeoe-R

soeoe-S

formula: C<sub>16</sub>H<sub>28</sub>O<sub>7</sub> (molar mass 332.39, total 1 compound)

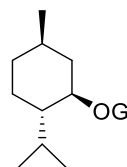

Oeeee

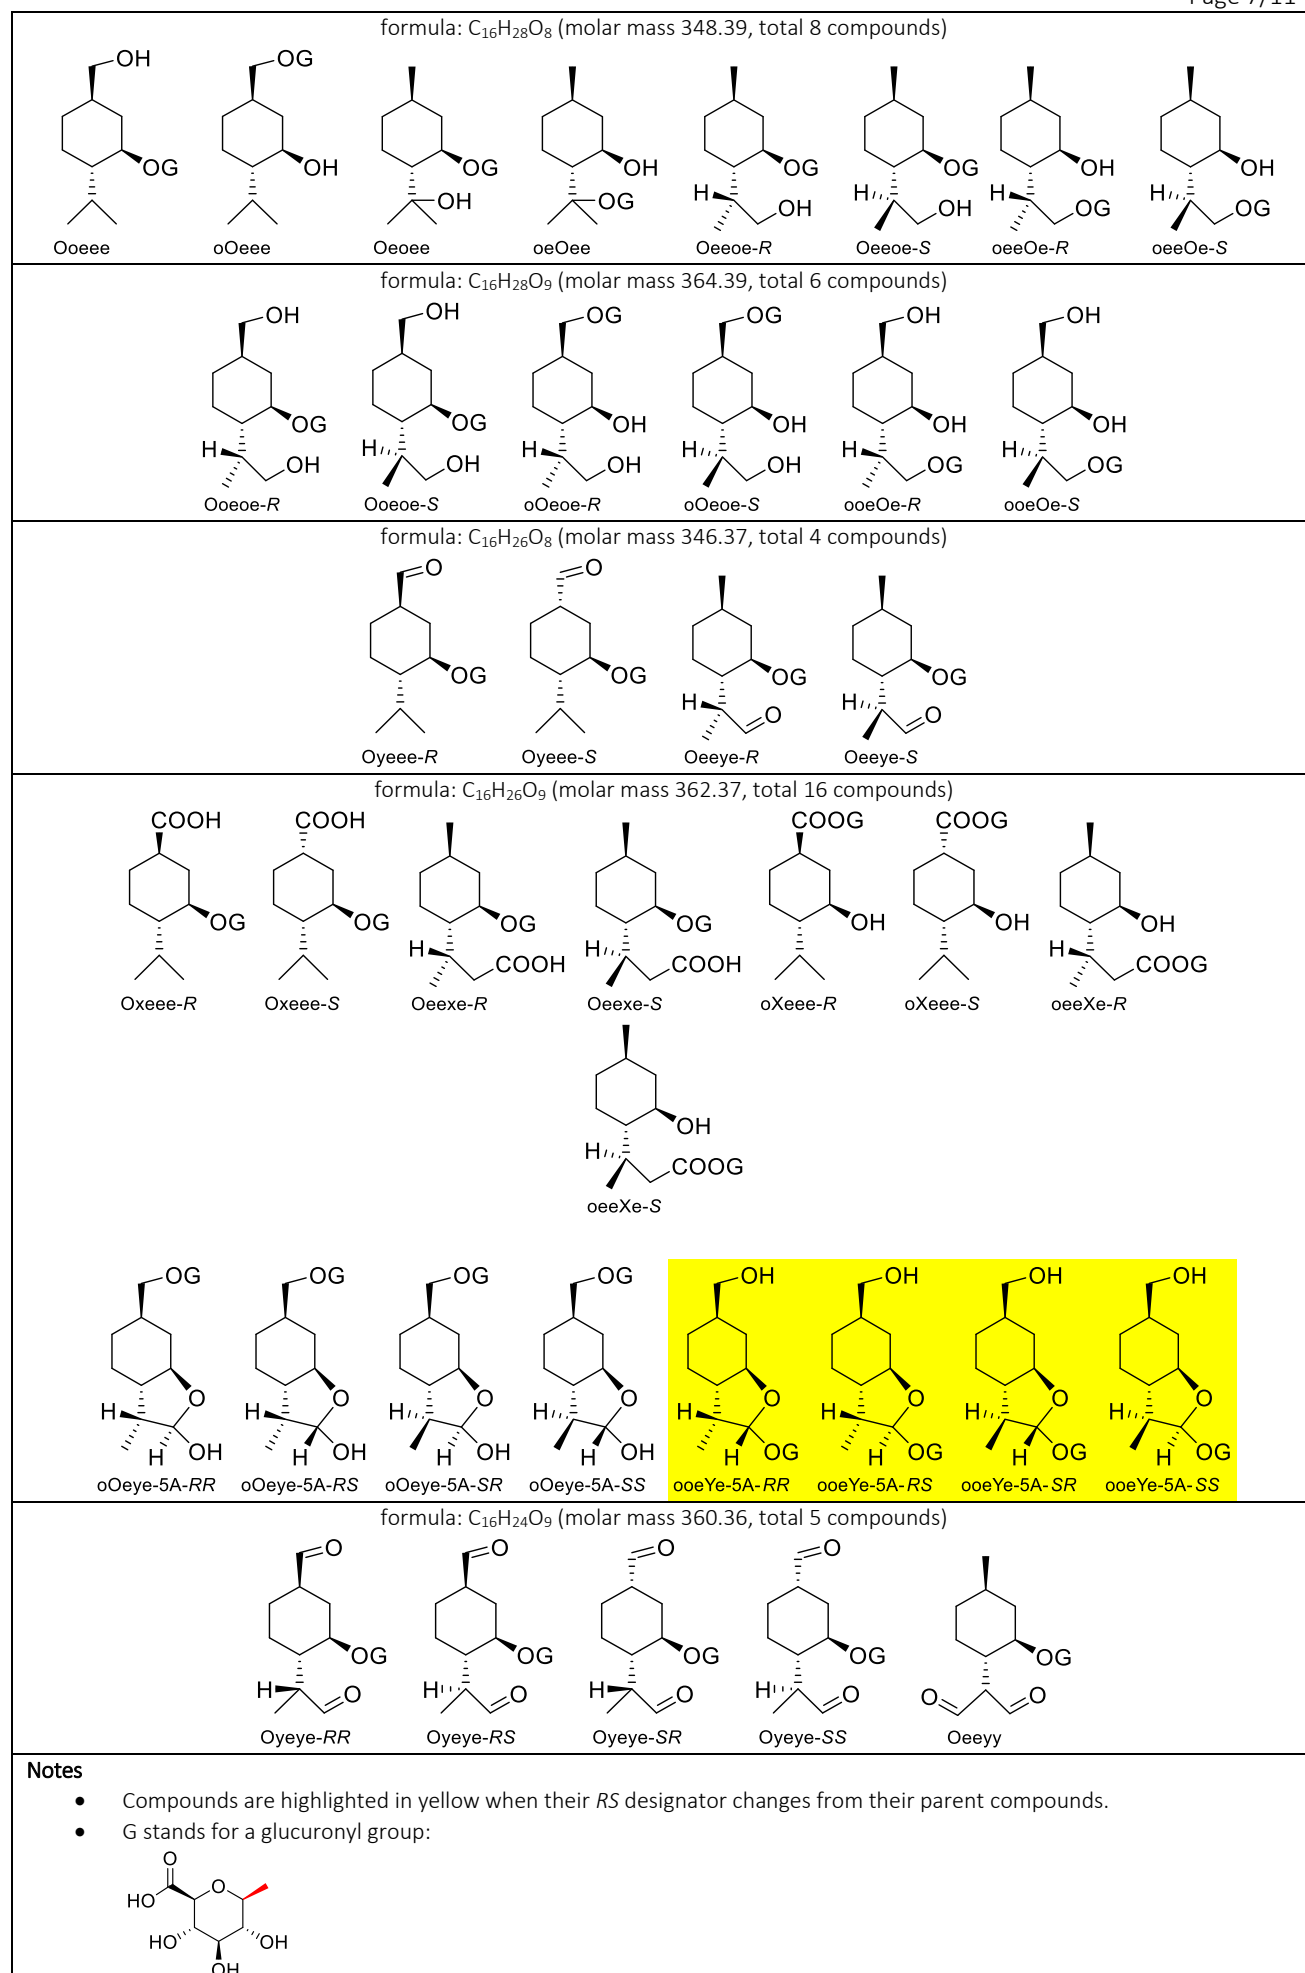

96  
97

**TABLE 2** Representative of oxidation reactions to alcohol, aldehyde and carboxylic acid, ring formation (dehydration reaction and aldol reaction) and conjugations with a glucuronic acid/sulfate group.

| Abbreviation/explanation                             | Example                                                                              |
|------------------------------------------------------|--------------------------------------------------------------------------------------|
| o1 for oxidation from alkane to alcohol              | 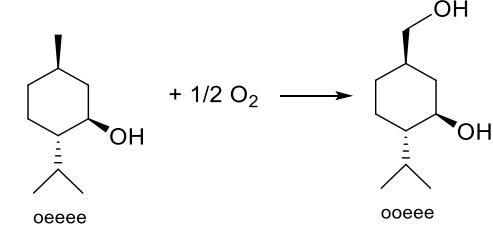   |
| o2 for oxidation from aldehyde to carboxylic acid    |    |
| o3 for oxidation form alcohol to aldehyde            |    |
| 4D for dehydration (four-membered ring formation)    |   |
| 5A for aldol reaction (five-membered ring formation) |  |
| g for conjugations with a glucuronic acid            |  |
| s for conjugations with a sulfate group              |  |

98  
99

**FIGURE 2** Lowest energy pathway for menthol metabolism

100 **FIGURE 3** Average standard Gibbs energies in solution phase and gas phase for oxidation from alkane to alcohol (o1), oxidation from aldehyde  
101 to carboxylic acid (o2), oxidation from alcohol to aldehyde (o3), dehydration or four-membered ring formation (4D), aldol reaction or five-  
102 membered ring formation (5A), conjugation with a glucuronic acid (g) and conjugation with a sulfate group (s) at five different positions of (-)-  
103 menthol.

104 **FIGURE 4** Relative stability of 102 (-)-menthol metabolite compounds in solution phase



## 105 Discussion

106

107 The most energetically favorable metabolic pathway shown in Figure 2. It has been proposed from Figure 1 (17-19) by  
108 identifying the lowest energy metabolite from each step in solution phase (Figure 4) with additional intermediates for  
109 completion. In general, the metabolite with the lowest relative energy in a step was the starting material for the lowest  
110 energy metabolite in the next. An exception to this was the compound soeoe-S, the lowest energy metabolite of step 3.

111 • This proposed pathway is in agreement with major aspects of those published, in particular the conversion  
112 of menthol to *p*-menthane-3,8-diol (oeoe). Partly due to increased solubility, the compound oeoe and its  
113 glucuronic acid conjugates, Oeoe/oeOee, were found to be major metabolites excreted in the urine of both  
114 rats and humans. (17-19) In contrast, *p*-menthane-3,7-diol (ooeee) and *p*-menthane-3,9-diol (oeoe) excreted  
115 from both rats and humans in small quantities. Figure 3 reports that oxidation from alkane to aldehyde at either  
116 position 7, 8, 9, or 10 is equally exothermic with a slight preference for position 8. Published evidence that  
117 oeoe is formed as a product of enzymatic activity (18) and this observed thermodynamic preference explain  
118 the disproportionately large amount of oeoe isolated experimentally compared to its isomers.

119 • Oxidation from alcohol to aldehyde is an endothermic reaction, hence metabolites containing aldehyde  
120 groups are either not detected or detected in small quantities and serve as intermediates to products of  
121 intramolecular aldol condensation to form cyclic ethers or further exothermic oxidation to carboxylic acid. In  
122 rats, no metabolites containing aldehyde groups were detected in the plasma, urine, bile, or feces. The  
123 corresponding metabolic pathways show a direct conversion from alcohol to carboxylic acid. Only the most  
124 recent study conducted by Hiki et al. (19) reported detection of aldehyde menthol glucuronides in human urine  
125 at very low levels; the corresponding pathway shows further conversion to cyclic ethers and carboxylic acid.  
126 Since oxidation is a stepwise process, Figure 2 shows this stepwise conversion from ooeee to oxoe-R.

127 • Likewise, metabolites resulting from sulfate conjugation were not detected in large quantities. (17-19) As  
128 shown in Figure 3, the reaction energies of sulfation (s-3) are not very exothermic in solution phase. The  
129 difference in reaction energies for this reaction in gas phase and solution phase is explained by charged species  
130 in the reactant side which is disproportionately stabilized by the solvent when compared to the product side.

131

132 A spreadsheet file in Supplementary Information summarizes the standard Gibbs energies of each of the reactions in the  
133 metabolic pathways described in Figure 1. The average energies of each of these types of reactions are summarized in  
134 Figure 3. The energies were clustered according to the type of reaction. According to the figure, oxidation reactions (o1  
135 and o2, addition of  $\frac{1}{2}\text{O}_2$ ) and conjugation with a sulfate group are the most exergonic and should occur easily. With an

136 exception of sulfation where charged species are present on the reactant side, relative ranking of average reaction  
137 energies in gas-phase and solution-phase are consistent and is always slightly less exergonic in gas-phase. This may be  
138 explained by the fact that oxidation tends to introduce polar functional groups whose interactions with water serve to  
139 stabilize the compound. The most endergonic reactions are four-membered ring formation (4D) and oxidation from  
140 alcohol to aldehyde (o3, removal of H<sub>2</sub>). The four-membered ring formation was proposed based on experimental  
141 evidence (18) published in 1988 and should be verified in further experiment. Difference in reaction energies due to  
142 position effect can be mostly explained by steric hindrance (i.e. g-8 has the highest reaction energy.) and inductive effect  
143 (i.e. o-8 producing secondary alcohol is the most exergonic.). The first step from the parents compound tends to be the  
144 most exergonic with an average at -38.6 kcal/mol and the average reaction energy decreases monotonically to around -  
145 3.1 kcal/mol at the fifth step.

## 146 Concluding remarks

147 In this study, gas-phase structures of menthol and its metabolites (a total of 102 compounds and 151 reactions) were  
148 obtained by quantum calculations at B3LYP/6-311++G(d,p) level. The standard Gibbs energies of their respective  
149 reactions in solution were calculated with the SMD solvation model and corrected for standard state conditions. The  
150 most thermodynamically favorable pathway reported was largely in agreement with previously published experimental  
151 results. Information obtained in this study open possibilities for further investigation of the pharmacological effects of  
152 menthol and its metabolites. Given that oxidation pathways of menthol are energetically favorable, potency and toxicity  
153 of these oxidized derivatives should be further investigated. Different stereoisomer of menthol as well as MD-based  
154 approaches could also be explored in future research.

## 155 Acknowledgement

156 We appreciate helpful suggestions from Assoc. Prof. Dr. Yuthana Tantirungrotechai.

## 157 References

- 158 1. Eccles R. Menthol and related cooling compounds. *Journal of Pharmacy and Pharmacology*. 1994;46(8):618-30.
- 159 2. Watson H, Hems R, Rowsell D, Spring D. New compounds with the menthol cooling effect. *J Soc Cosmet Chem*. 1978;29(185):200.
- 160 3. Swandulla D, Carbone E, Schäfer K, Lux H. Effect of menthol on two types of Ca currents in cultured sensory neurons of vertebrates. *Pflügers Archiv*.  
161 1987;409(1-2):52-9.
- 162 4. Swandulla D, Schäfer K, Lux H. Calcium channel current inactivation is selectively modulated by menthol. *Neuroscience letters*. 1986;68(1):23-8.
- 163 5. Thorup I, Würtzen G, Carstensen J, Olsen P. Short term toxicity study in rats dosed with pulegone and menthol. *Toxicology letters*. 1983;19(3):207-  
164 10.
- 165 6. Statista. Production volume of menthol in India from FY 2013 to FY 2017 (in thousand metric tons) 2019 [Available from:  
166 <https://www.statista.com/statistics/727911/india-menthol-production-volume/>]
- 167 7. Patel T, Ishiujii Y, Yosipovitch G. Menthol: a refreshing look at this ancient compound. *Journal of the American Academy of Dermatology*.  
168 2007;57(5):873-8.
- 169 8. Karapinar M, Aktuğ ŞE. Inhibition of foodborne pathogens by thymol, eugenol, menthol and anethole. *International Journal of Food Microbiology*.  
170 1987;4(2):161-6.
- 171 9. Galeotti N, Mannelli LDC, Mazzanti G, Bartolini A, Ghelardini C. Menthol: a natural analgesic compound. *Neuroscience letters*. 2002;322(3):145-8.
- 172 10. Brauchi S, Orio P, Latorre R. Clues to understanding cold sensation: thermodynamics and electrophysiological analysis of the cold receptor TRPM8.  
173 *Proceedings of the National Academy of Sciences*. 2004;101(43):15494-9.

- 174 11. Sherkheli MA, Vogt-Eisele AK, Bura D, Márques LRB, Gisselmann G, Hatt H. Characterization of selective TRPM8 ligands and their structure activity  
175 response (SAR) relationship. *Journal of Pharmacy & Pharmaceutical Sciences*. 2010;13(2):242-53.
- 176 12. Giovino GA, Sidney S, Gfroerer JC, O'Malley PM, Allen JA, Richter PA, et al. Epidemiology of menthol cigarette use. *Nicotine & Tobacco Research*.  
177 2004;6(Suppl\_1):S67-S81.
- 178 13. Ahijevych K, Garrett BE. Menthol pharmacology and its potential impact on cigarette smoking behavior. *Nicotine & Tobacco Research*.  
179 2004;6(Suppl\_1):S17-S28.
- 180 14. Rakieten N, Rakieten ML, Boykin M. Effects of menthol vapor on the intact animal with special reference to the upper respiratory tract. *Journal of*  
181 *the American Pharmaceutical Association*. 1954;43(7):390-2.
- 182 15. Bernson VS, Petterson B. The toxicity of menthol in short-term bioassays. *Chemico-biological interactions*. 1983;46(2):233-46.
- 183 16. Joint FAO/WHO Expert Committee on Food Additives WHOFAOotUN, editor Evaluation of certain food additives: twentieth report of the Joint  
184 FAO/WHO Expert Committee on Food Additives; meeting held in Rome from 21 to 29 April 1976. Geneva2009.
- 185 17. Yamaguchi T, Caldwell J, Farmer PB. Metabolic fate of [3H]-l-menthol in the rat. *Drug Metabolism and Disposition*. 1994;22(4):616-24.
- 186 18. Madyastha KM, Srivatsan V. Studies on the metabolism of l-menthol in rats. *Drug Metabolism and Disposition*. 1988;16(5):765-72.
- 187 19. Hiki N, Kaminishi M, Hasunuma T, Nakamura M, Nomura S, Yahagi N, et al. A phase I study evaluating tolerability, pharmacokinetics, and preliminary  
188 efficacy of L-menthol in upper gastrointestinal endoscopy. *Clinical Pharmacology & Therapeutics*. 2011;90(2):221-8.
- 189 20. Miyazawa M, Marumoto S, Takahashi T, Nakahashi H, Haigou R, Nakanishi K. Metabolism of (+)-and (-)-menthols by CYP2A6 in human liver  
190 microsomes. *Journal of oleo science*. 2011;60(3):127-32.
- 191 21. Gelal A, Jacob P, Yu L, Benowitz NL. Disposition kinetics and effects of menthol. *Clinical Pharmacology & Therapeutics*. 1999;66(2):128-35.
- 192 22. Marenich AV, Cramer CJ, Truhlar DG. Universal solvation model based on solute electron density and on a continuum model of the solvent defined  
193 by the bulk dielectric constant and atomic surface tensions. *The Journal of Physical Chemistry B*. 2009;113(18):6378-96.
- 194 23. Limpanuparb T, Roongruangsree P, Areekul C. A DFT investigation of the blue bottle experiment: E<sup>o</sup> half-cell analysis of autoxidation catalysed by  
195 redox indicators. *Royal Society Open Science*. 2017;4(11):170708.
- 196 24. Limpanuparb T, Noorat R, Tantirungrotechai Y. In Silico Investigation of Mitragynine and 7-Hydroxymitragynine Metabolism. *BMC Research Notes*.  
197 2019;12.
- 198 25. Ho J, Ertem MZ. Calculating free energy changes in continuum solvation models. *The Journal of Physical Chemistry B*. 2016;120(7):1319-29.
- 199 26. Ho J, Coote ML. A universal approach for continuum solvent pKa calculations: are we there yet? *Theoretical Chemistry Accounts*. 2010;125(1-2):3.
- 200 27. Camaioni DM, Schwerdtfeger CA. Comment on "Accurate experimental values for the free energies of hydration of H<sup>+</sup>, OH<sup>-</sup>, and H<sub>3</sub>O<sup>+</sup>". *The Journal*  
201 *of Physical Chemistry A*. 2005;109(47):10795-7.
- 202 28. Bryantsev VS, Diallo MS, Goddard Iii WA. Calculation of solvation free energies of charged solutes using mixed cluster/continuum models. *The*  
203 *Journal of Physical Chemistry B*. 2008;112(32):9709-19.
- 204 29. Shao Y, Gan Z, Epifanovsky E, Gilbert AT, Wormit M, Kussmann J, et al. Advances in molecular quantum chemistry contained in the Q-Chem 4  
205 program package. *Molecular Physics*. 2015;113(2):184-215.
- 206 30. Wolfram Research Inc. *Mathematica*. 2018.
- 207 31. Härtner J, Reinscheid UM. Conformational analysis of menthol diastereomers by NMR and DFT computation. *Journal of Molecular Structure*.  
208 2008;872(2-3):145-9.

209

## 210 Supporting information captions

211 All Q-CHEM output files, Wolfram Mathematica notebook, shell script and Microsoft Excel spreadsheet for the  
212 calculations of Gibbs energies of reaction are provided. Case sensitivity file system is required to open these files properly.

213 An instruction to enable this in Windows 10 is provided in the zip file.



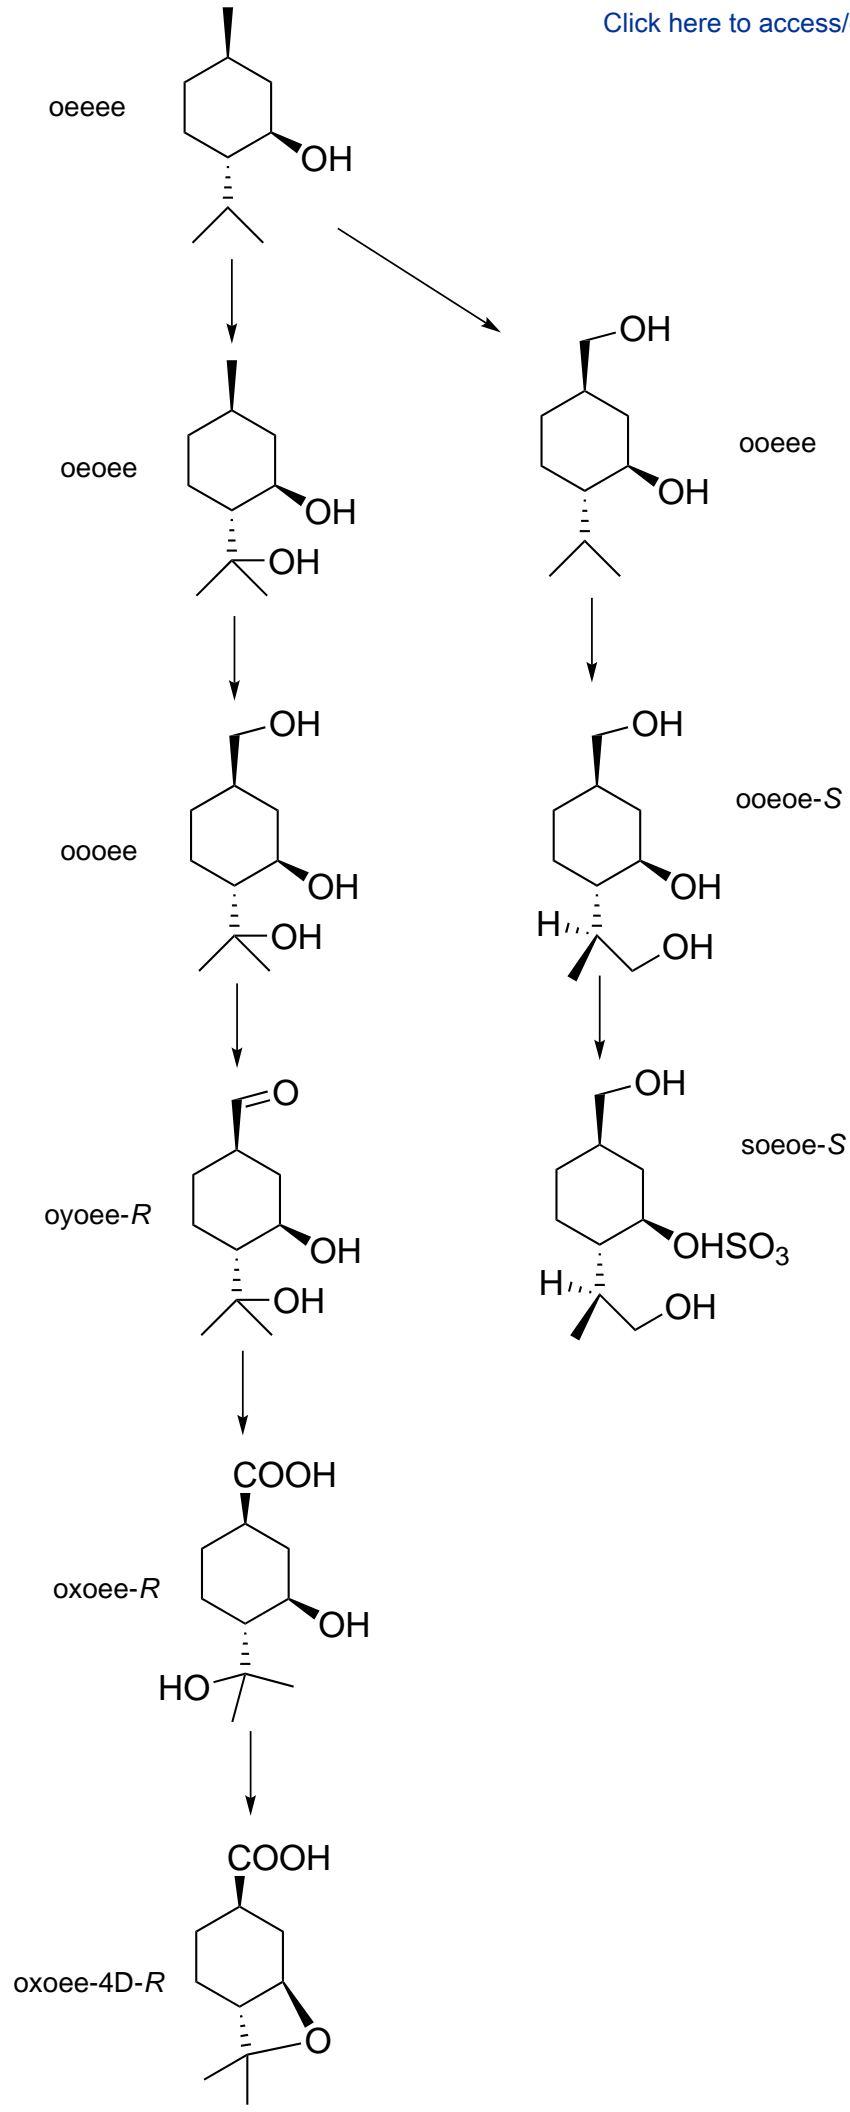

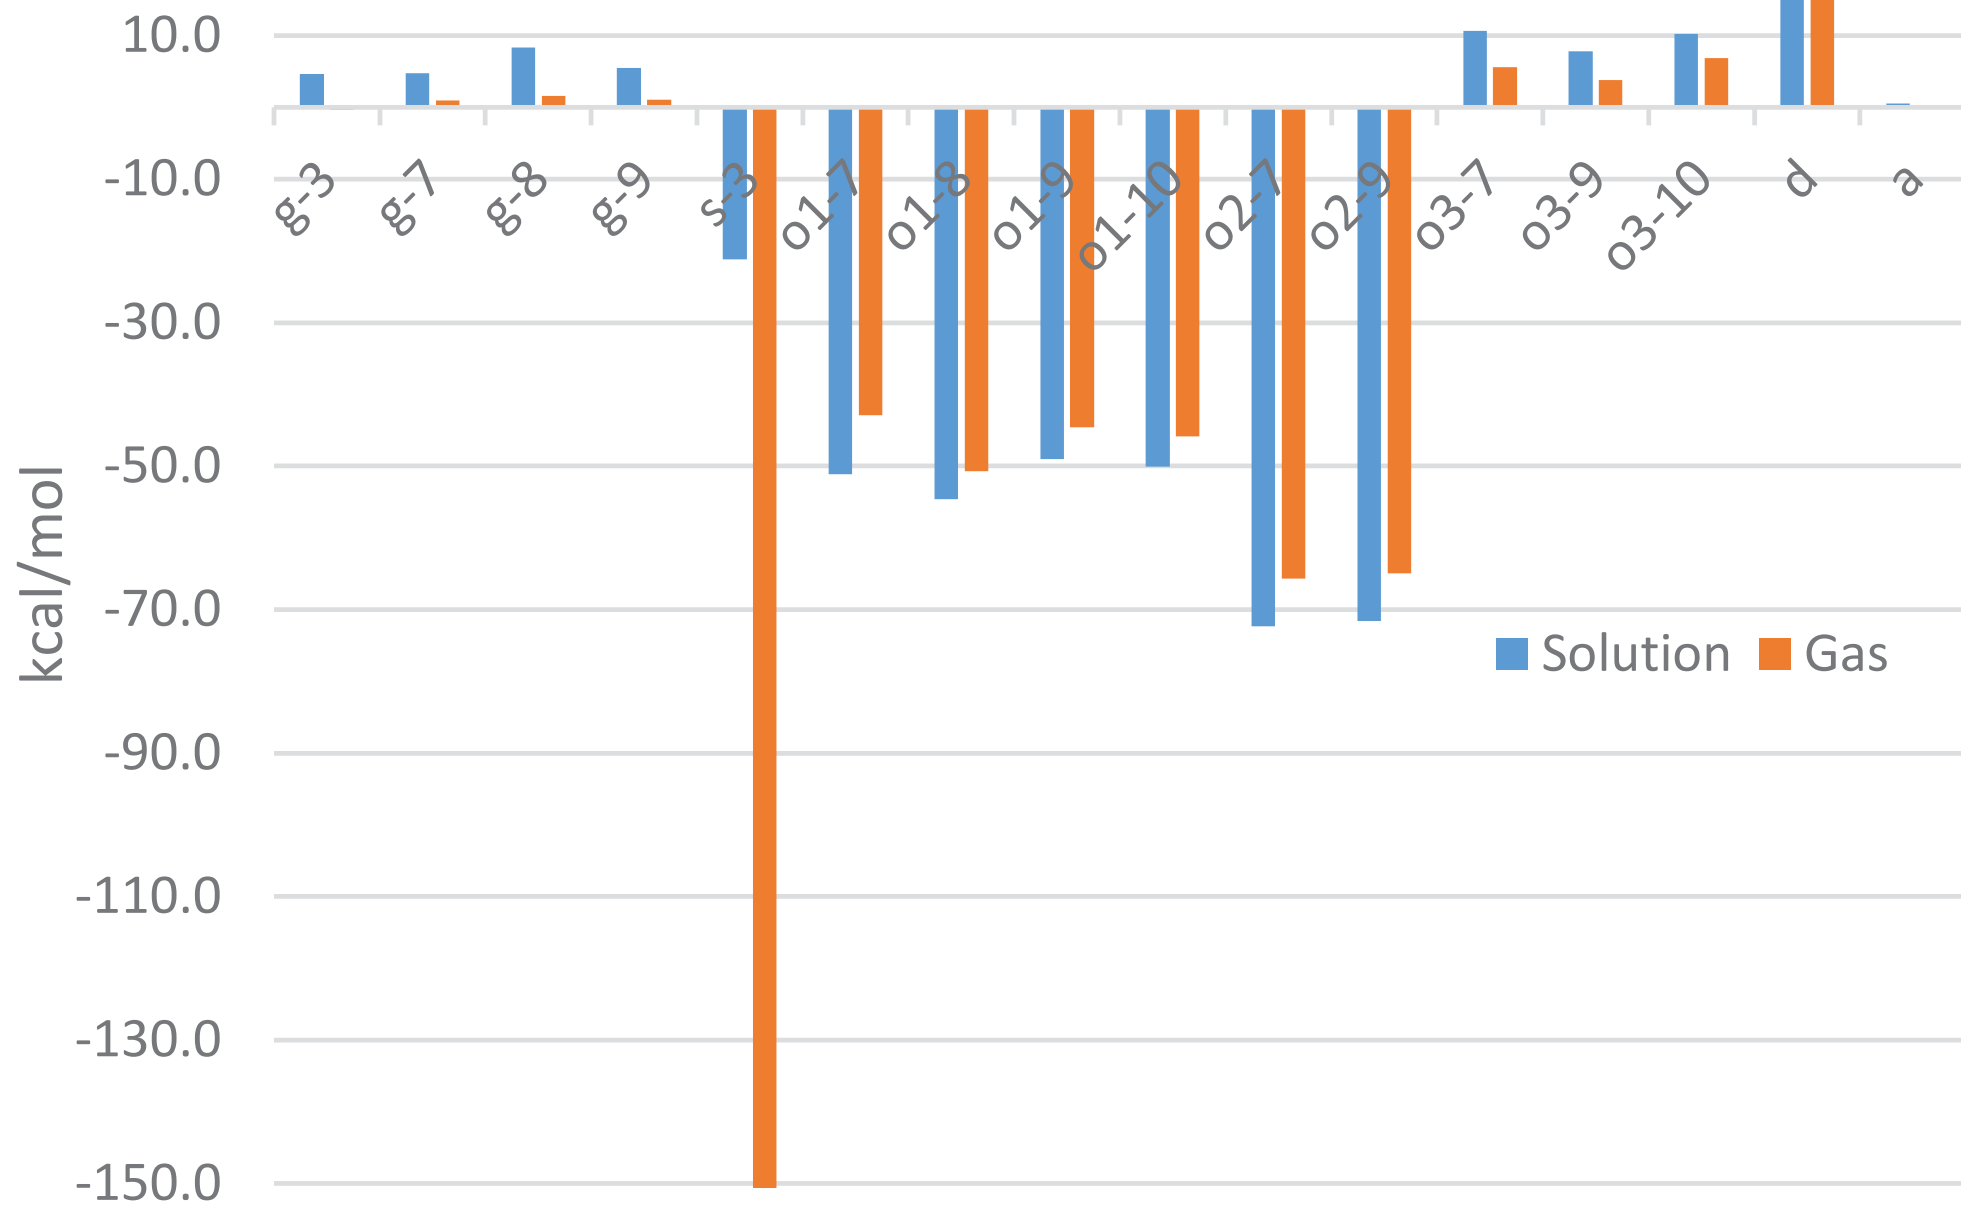

Figure4

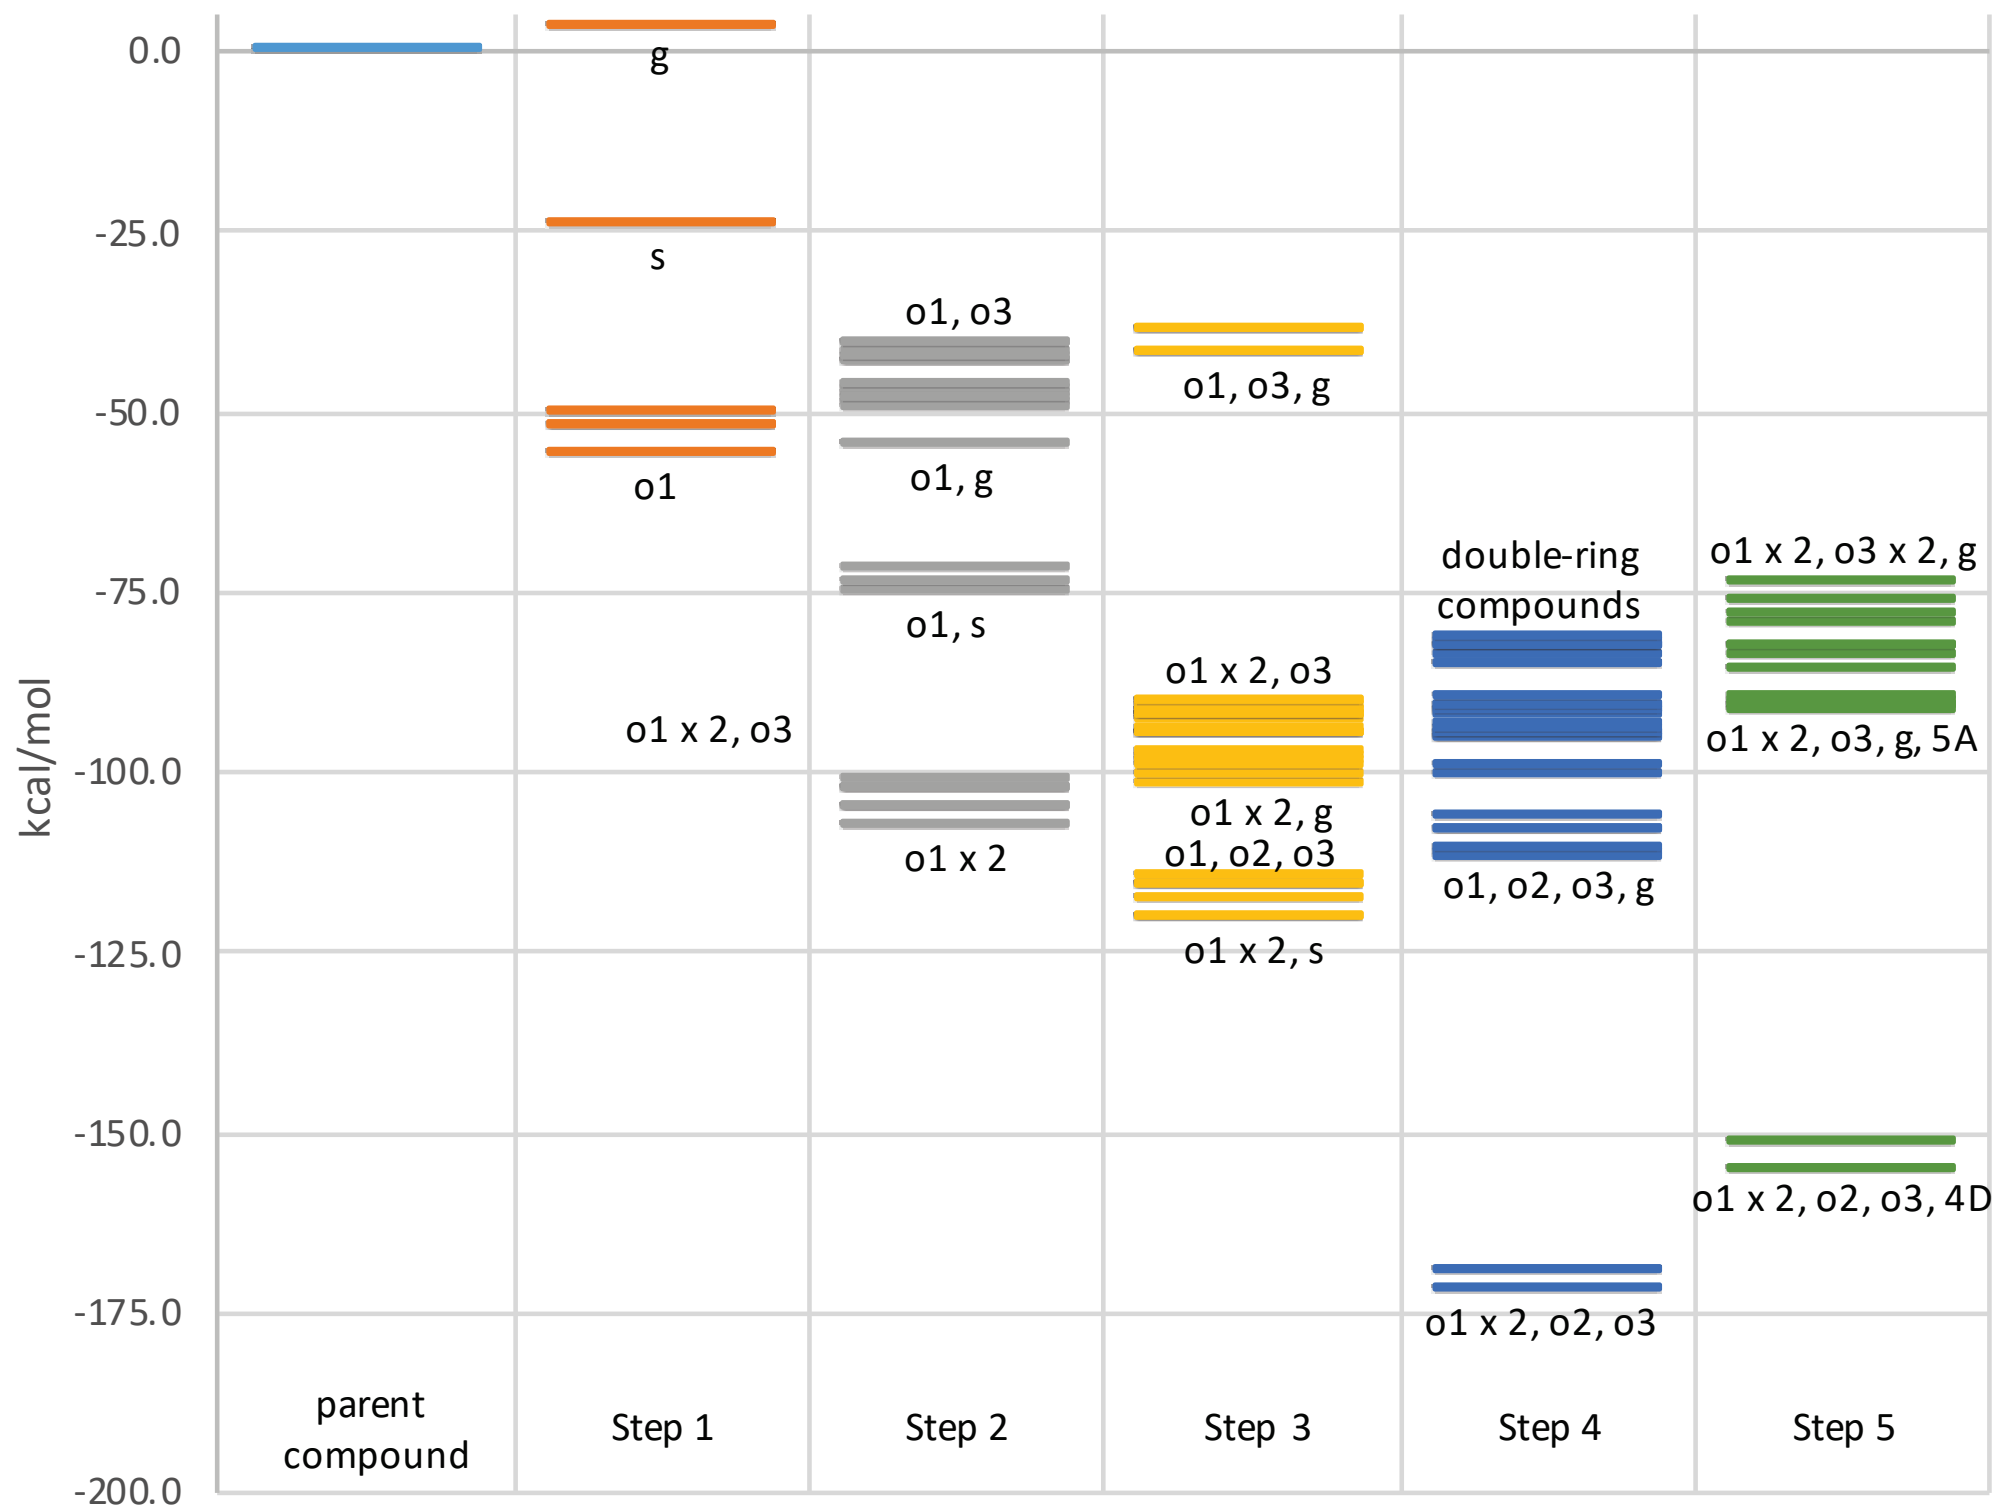

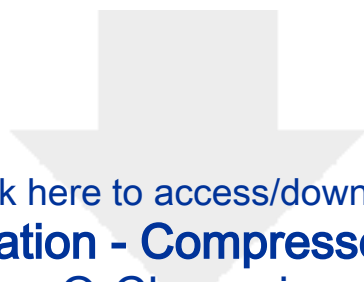

[Click here to access/download](#)

**Supporting Information - Compressed/ZIP File Archive**  
Q-Chem.zip

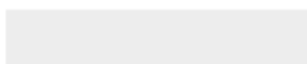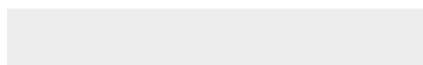

Source: https://www.biorxiv.org/content/10.1101/618975v2.full.pdf
